# Supplementary material for: Control of structure, stability and catechol oxidase activity of copper(ii) complexes by the denticity of tripodal platforms
Source: Royal Society of Chemistry journal article supplement (doi:10.1039/c7nj02013a), 2017-01-01
Supplement: c7nj02013a1.pdf [file c7nj02013a1.pdf]

Supporting Information

## Control of structure, stability and catechol oxidase activity of copper(II) complexes by the denticity of tripodal platforms

Ferenc Matyuska<sup>a</sup>, Nóra V. May<sup>b</sup>, Attila Bényei<sup>c</sup> and Tamás Gajda<sup>a,\*</sup>

<sup>a</sup> Department of Inorganic and Analytical Chemistry, University of Szeged, Dóm tér 7, H-6720 Szeged, Hungary. E-mail: gajda@chem.u-szeged.hu

<sup>b</sup> Research Centre for Natural Sciences HAS, Magyar tudósok körútja 2, H-1117 Budapest, Hungary

<sup>c</sup> Department of Pharmaceutical Chemistry, University of Debrecen, Egyetem tér 1, Debrecen H-4032, Hungary

**Table S1.** Geometric parameters (Å, °) for trenpyz×3HCl×2H<sub>2</sub>O

**Figure S1.** H-bonding network in the immediate surrounding of the ligand in trenpyz×3HCl×2H<sub>2</sub>O (H atoms and the third leg of the ligand are omitted for clarity).

**Table S2.** Selected hydrogen bond distances and angles in the crystal structure **1**

**Figure S2.** Packing arrangement of **1** viewing from the crystallographic directions a, b and c

**Figure S3.** Conformational comparison of the metal complex cation [Cu(trenpyz)]<sup>2+</sup> in crystal structure **1** (pink), with [Cu(H<sub>2</sub>L)]<sup>+</sup> in OREGAU [OREGAU] (coloured by element).

**Figure S4.** Hydrogen bond connections between the [Cu(trenpyz)]<sup>2+</sup> complex cation and perchlorate

**Figure S5** Individual molar Vis/NIR spectra of the mononuclear copper(II)-trenpyz complexes

**Figure S6** Individual molar Vis/NIR spectra of the trinuclear copper(II)-trenpyz complexes

**Figure S7** Effect of pH on the Vis/NIR spectra of the copper(II)-trenpyz 3:2 systems in 50% EtOH-H<sub>2</sub>O,

**Figure S8** Individual molar Vis/NIR spectra of the trinuclear copper(II)-trenpyz complexes in 50% EtOH-H<sub>2</sub>O

**Figure S9.** UV-Vis spectra of Cu(II)-L 3/2 system as a function of H<sub>2</sub>dtbc concentration under anaerobic conditions in 50% EtOH-H<sub>2</sub>O at pH = 7.2 ( $c_{\text{Cu}_3\text{H}_x\text{L}_2} = 3.358 \times 10^{-4}$  M).

**Figure S10.** Cyclic voltammogram of the copper(II)-trenpyz 3/2 system in 50 % EtOH-H<sub>2</sub>O at pH = 7.2

**Figure S11.** Rate constants of H<sub>2</sub>dtbc oxidation promoted by the copper(II)-trenpyz 3/2 system in 50% EtOH-H<sub>2</sub>O as a function of the concentration of trinuclear complexes

**Figure S12.** Rate constants of H<sub>2</sub>dtbc oxidation promoted by the copper(II)-trenpyz 3/2 system in 50% EtOH-H<sub>2</sub>O as a function of the concentration of dissolved dioxygen

**Figure S13.** H<sub>2</sub>O<sub>2</sub> and dtbq formation during H<sub>2</sub>dtbc oxidation promoted by the copper(II)-trenpyz 3/2 system in aqueous solution at pH = 8.1

**Figure S14.** Time dependence of EPR spectra detected at room temperature and at 77 K of the Cu(II)-trenpyz 3/2 system during the oxidation of H<sub>2</sub>dtbc under aerobic conditions

**Table S1.** Geometric parameters (Å, °) for  $\text{trenpyz} \times 3\text{HCl} \times 2\text{H}_2\text{O}$ 

|             |            |                                      |            |
|-------------|------------|--------------------------------------|------------|
| C2—N1       | 1.472 (9)  | C14—H14                              | 0.93       |
| C2—C3       | 1.504 (12) | C15—N11                              | 1.343 (15) |
| C2—H2C      | 0.97       | C15—H11                              | 0.93       |
| C2—H2D      | 0.97       | N1—C2 <sup>i</sup>                   | 1.472 (9)  |
| C3—N4       | 1.462 (10) | N1—C2 <sup>ii</sup>                  | 1.472 (9)  |
| C3—H3A      | 0.97       | N4—H4A                               | 0.89       |
| C3—H3B      | 0.97       | N4—H4B                               | 0.89       |
| C5—C13      | 1.463 (12) | N11—N12                              | 1.327 (12) |
| C5—N4       | 1.512 (10) | N11—H11A                             | 0.86       |
| C5—H5A      | 0.97       | O1W—H1A                              | 0.86 (2)   |
| C5—H5B      | 0.97       | O1W—H1B                              | 0.86 (2)   |
| C13—N12     | 1.336 (13) | O2W—H2A                              | 1.0 (2)    |
| C13—C14     | 1.401 (14) | O2W—H2B                              | 0.96 (17)  |
| C14—C15     | 1.329 (15) |                                      |            |
|             |            |                                      |            |
| N1—C2—C3    | 114.0 (7)  | C15—C14—C13                          | 106.9 (10) |
| N1—C2—H2C   | 108.8      | C15—C14—H14                          | 126.6      |
| C3—C2—H2C   | 108.8      | C13—C14—H14                          | 126.6      |
| N1—C2—H2D   | 108.8      | C14—C15—N11                          | 105.9 (9)  |
| C3—C2—H2D   | 108.8      | C14—C15—H11                          | 127.1      |
| H2C—C2—H2D  | 107.7      | N11—C15—H11                          | 127        |
| N4—C3—C2    | 112.2 (6)  | C2 <sup>i</sup> —N1—C2 <sup>ii</sup> | 109.9 (5)  |
| N4—C3—H3A   | 109.2      | C2 <sup>i</sup> —N1—C2               | 109.9 (5)  |
| C2—C3—H3A   | 109.2      | C2 <sup>ii</sup> —N1—C2              | 109.9 (5)  |
| N4—C3—H3B   | 109.2      | C3—N4—C5                             | 113.8 (6)  |
| C2—C3—H3B   | 109.2      | C3—N4—H4A                            | 108.8      |
| H3A—C3—H3B  | 107.9      | C5—N4—H4A                            | 108.8      |
| C13—C5—N4   | 113.1 (7)  | C3—N4—H4B                            | 108.8      |
| C13—C5—H5A  | 109        | C5—N4—H4B                            | 108.8      |
| N4—C5—H5A   | 109        | H4A—N4—H4B                           | 107.7      |
| C13—C5—H5B  | 108.9      | N12—N11—C15                          | 113.3 (9)  |
| N4—C5—H5B   | 108.9      | N12—N11—H11A                         | 123.4      |
| H5A—C5—H5B  | 107.8      | C15—N11—H11A                         | 123.4      |
| N12—C13—C14 | 109.3 (7)  | N11—N12—C13                          | 104.5 (8)  |
| N12—C13—C5  | 121.6 (9)  | H1A—O1W—H1B                          | 136 (6)    |
| C14—C13—C5  | 129.1 (10) | H2A—O2W—H2B                          | 121 (10)   |
|             |            |                                      |            |
| N1—C2—C3—N4 | 70.7 (9)   | C3—C2—N1—C2 <sup>ii</sup>            | 79.6 (11)  |

|                          |            |                 |            |
|--------------------------|------------|-----------------|------------|
| N4—C5—C13—N12            | 88.4 (10)  | C2—C3—N4—C5     | -178.8 (8) |
| N4—C5—C13—C14            | -90.3 (11) | C13—C5—N4—C3    | -166.5 (8) |
| N12—C13—C14—C15          | -0.6 (10)  | C14—C15—N11—N12 | -3.8 (11)  |
| C5—C13—C14—C15           | 178.3 (8)  | C15—N11—N12—C13 | 3.4 (10)   |
| C13—C14—C15—N11          | 2.5 (10)   | C14—C13—N12—N11 | -1.6 (9)   |
| C3—C2—N1—C2 <sup>i</sup> | -159.2 (8) | C5—C13—N12—N11  | 179.4 (7)  |

Symmetry codes: (i)  $y, z, x$ ; (ii)  $z, x, y$ .

Hydrogen-bond geometries (Å, °)

| $D-H\cdots A$                                      | $D-H$    | $H\cdots A$ | $D\cdots A$ | $D-H\cdots A$ |
|----------------------------------------------------|----------|-------------|-------------|---------------|
| C2—H2D $\cdots$ CL2                                | 0.97     | 2.91        | 3.699 (9)   | 140           |
| C5—H5A $\cdots$ CL2 <sub>\$1</sub> <sup>iii</sup>  | 0.97     | 2.84        | 3.755 (9)   | 157           |
| N4—H4A $\cdots$ CL2                                | 0.89     | 2.21        | 3.091 (7)   | 168           |
| N4—H4B $\cdots$ CL1                                | 0.89     | 2.34        | 3.216 (7)   | 170           |
| N11—H11A $\cdots$ CL2 <sub>\$2</sub> <sup>iv</sup> | 0.86     | 2.33        | 3.173 (9)   | 168           |
| O1W—H1B $\cdots$ N12                               | 0.86 (2) | 2.34 (13)   | 2.859 (9)   | 119 (11)      |
| O1W—H1B $\cdots$ O2W                               | 0.86 (2) | 1.84 (8)    | 2.37 (3)    | 118 (8)       |

Symmetry codes: (iii)  $-y+1/2, -z+1/2, x+1/2$ ; (iv)  $x, -y+1, -z+1$ .

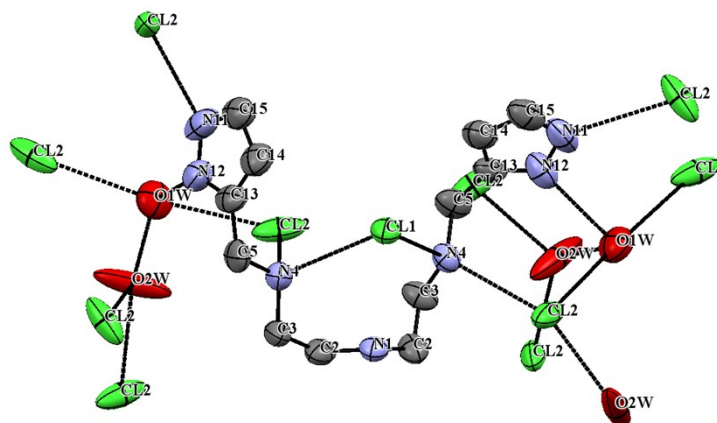

**Figure S1.** H-bonding network in the immediate surrounding of the ligand in  $\text{trenpyz} \times 3\text{HCl} \times 2\text{H}_2\text{O}$  (H atoms and the third leg of the ligand are omitted for clarity).

**Table S2.** Selected hydrogen bond distances and angles in the crystal structure **1**

| <i>D</i> —H··· <i>A</i>      | <i>D</i> —H (Å) | H··· <i>A</i> (Å) | <i>D</i> ··· <i>A</i> (Å) | <i>D</i> —H··· <i>A</i> (°) |
|------------------------------|-----------------|-------------------|---------------------------|-----------------------------|
| N2—H2N···N9                  | 1.00            | 2.07              | 2.926(4)                  | 143                         |
| N4—H4N···N6                  | 0.88            | 2.07              | 2.808(5)                  | 140                         |
| N5—H5N···O5                  | 1.00            | 2.08              | 2.996(5)                  | 151                         |
| N7—H7N···O2 <sup>i</sup>     | 0.88            | 2.49              | 3.084(4)                  | 126                         |
| N7—H7N—O4 <sup>i</sup>       | 0.88            | 2.11              | 2.945(4)                  | 159                         |
| N8—H8N···O2 <sup>ii</sup>    | 1.00            | 2.58              | 3.215(5)                  | 121                         |
| N10—H10N···O6 <sup>iii</sup> | 0.88            | 2.25              | 3.028(6)                  | 148                         |
| C2—H2A···O7 <sup>iv</sup>    | 0.99            | 2.54              | 3.096(5)                  | 115                         |
| C13—H13A···O3                | 0.99            | 2.59              | 3.232(5)                  | 123                         |
| C13—H13B···O1                | 0.99            | 2.59              | 3.338(5)                  | 132                         |
| C14—H14B···O2 <sup>ii</sup>  | 0.99            | 2.45              | 3.151(5)                  | 127                         |
| C17—H17···O1 <sup>v</sup>    | 0.95            | 2.49              | 3.311(5)                  | 145                         |
| C18—H18···O1 <sup>vi</sup>   | 0.95            | 2.59              | 3.295(4)                  | 131                         |

Symmetry codes: <sup>i</sup>  $x, 1/2-y, -1/2+z$ ; <sup>ii</sup>  $-x, -1/2+y, 1/2-z$ ; <sup>iii</sup>  $1-x, 1/2+y, 1/2-z$ ; <sup>iv</sup>  $1-x, 1-y, 1-z$ ; <sup>v</sup>  $x, 3/2-y, -1/2+z$ ;  
<sup>vi</sup>  $-x, 1-y, -z$

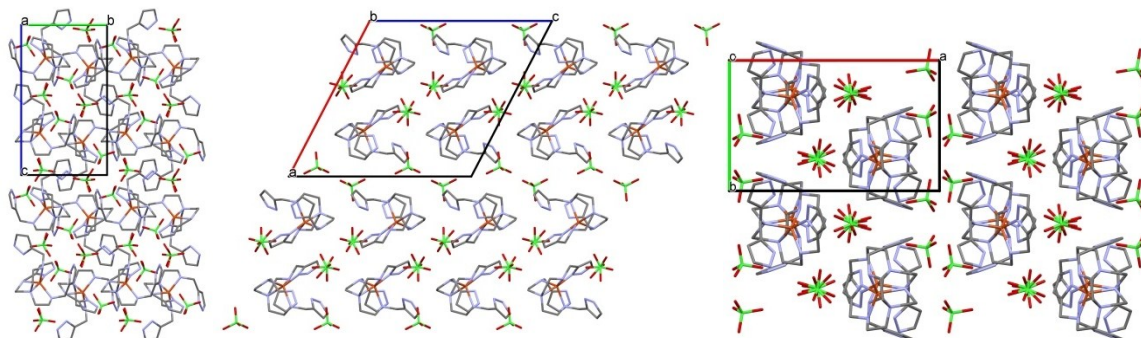**Figure S2.** Packing arrangement of **1** viewing from the crystallographic directions a, b and c

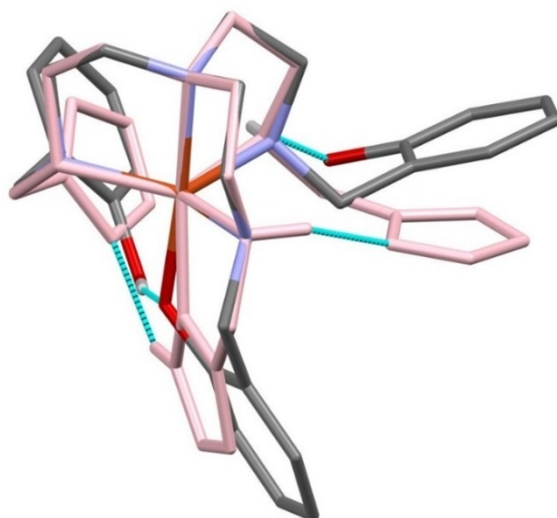

**Figure S3.** Conformational comparison of the metal complex cation  $[\text{Cu}(\text{trenpyz})]^{2+}$  in crystal structure **1** (pink), with  $[\text{Cu}(\text{H}_2\text{L})]^+$  in OREGAU [OREGAU] (coloured by element). Selected bond lengths ( $\text{\AA}$ ) and angles ( $^\circ$ ) for OREGAU: Cu1-N2 2.028(2), Cu1-N1 2.042(3), Cu1-N3 2.058(2), Cu1-N4 2.205(2), N2-Cu1-N1 85.62(9), N2-Cu1-N4 84.52(9), N2-Cu1-N3 85.60(9), N1-Cu1-N3 134.9(1), N3-Cu1-N4 116.15(9), N1-Cu1-N4 106.9(1), O1-Cu1-N2 175.13(8).

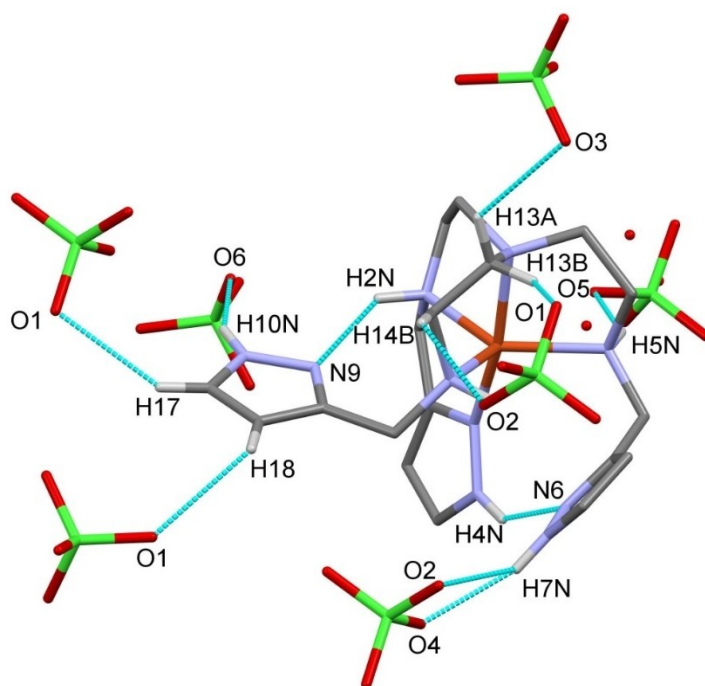

**Figure S4.** Hydrogen bond connections between the  $[\text{Cu}(\text{trenpyz})]^{2+}$  complex cation and perchlorate

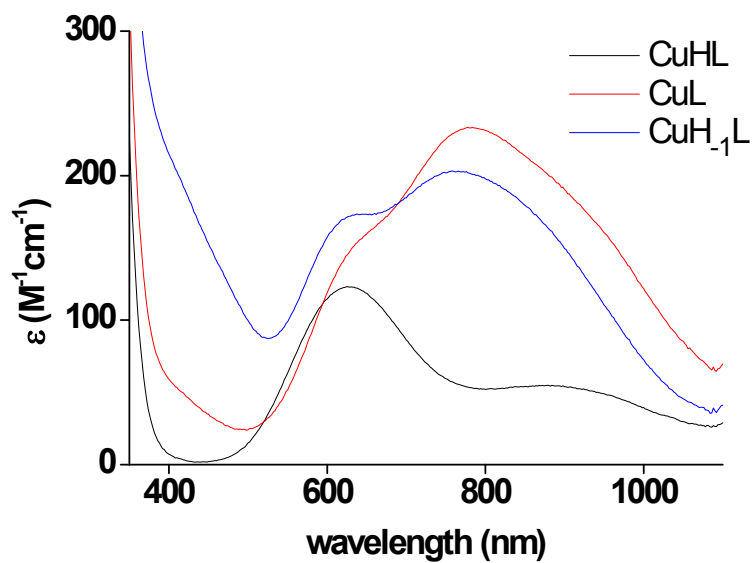

**Figure S5** Individual molar Vis/NIR spectra of the mononuclear copper(II)-trenpyz complexes

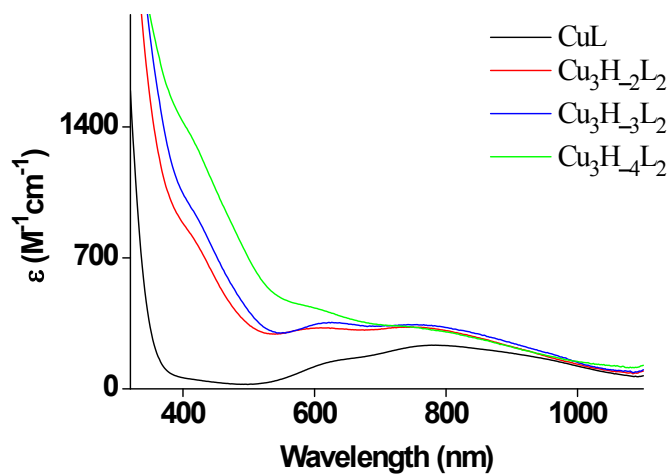

**Figure S6** Individual molar Vis/NIR spectra of the trinuclear copper(II)-trenpyz complexes

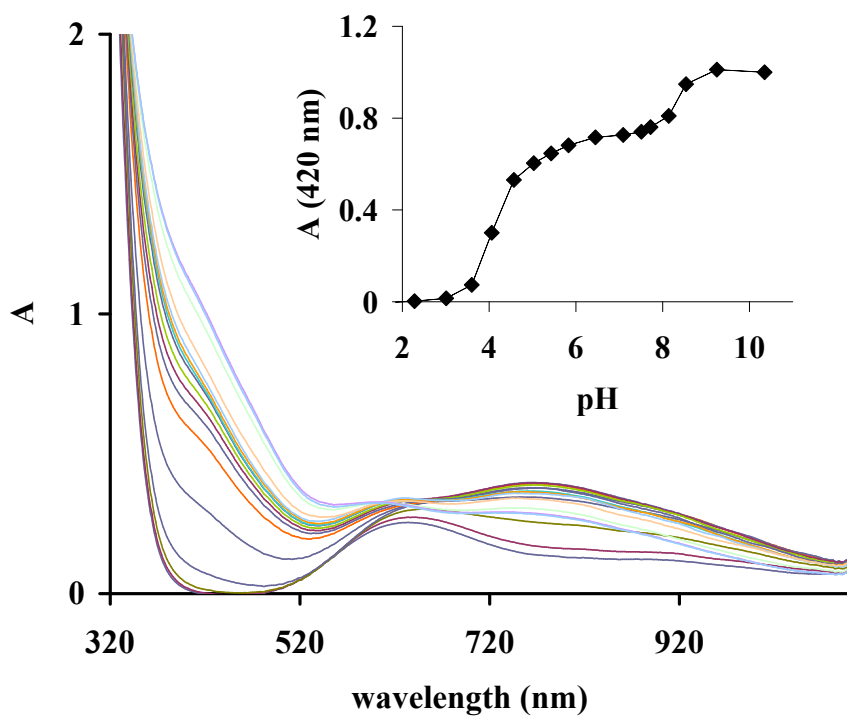

**Figure S7** Effect of pH on the Vis/NIR spectra of the copper(II)-trenpyz 3:2 systems in 50% EtOH-H<sub>2</sub>O, insert shows the change of absorbances at 420 nm (T = 298 K, I = 0.1 M NaCl, [Cu<sup>2+</sup>]<sub>tot</sub> = 2.881 mM, [trenpyz] = 1.938 mM, pH = 2.0–11.3)

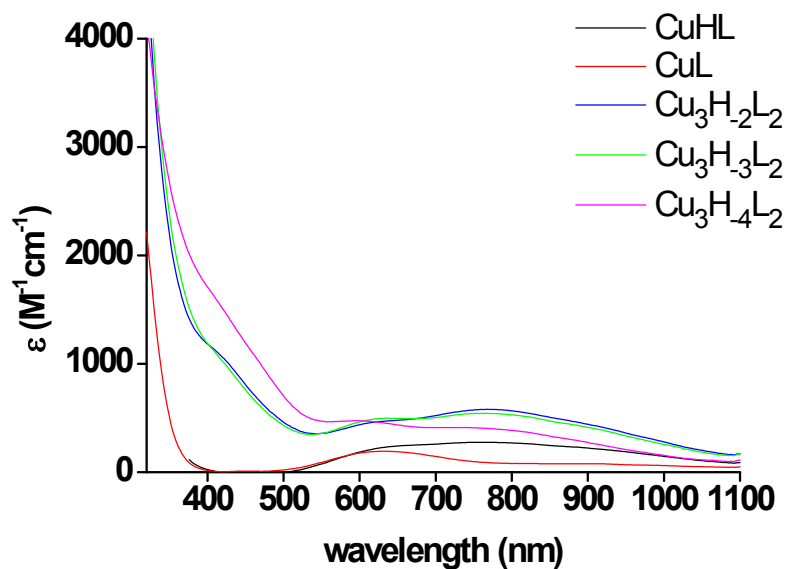

**Figure S8** Individual molar Vis/NIR spectra of the trinuclear copper(II)-trenpyz complexes in 50% EtOH-H<sub>2</sub>O

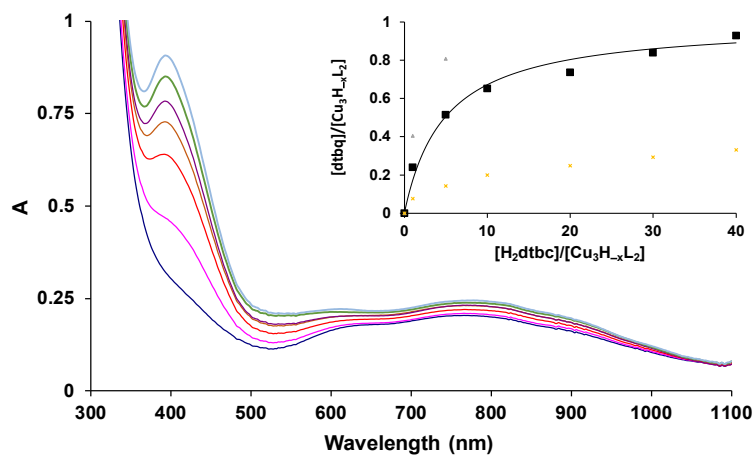

**Figure S9.** UV-Vis spectra of Cu(II)-L 3/2 system as a function of H<sub>2</sub>dtbc concentration under anaerobic conditions in 50% EtOH-H<sub>2</sub>O at pH = 7.2 ( $c_{\text{Cu}_3\text{H}_x\text{L}_2} = 3.358 \times 10^{-4}$  M). Insert shows the formation of dtbc (measured at 400 nm) as a function of H<sub>2</sub>dtbc concentration.

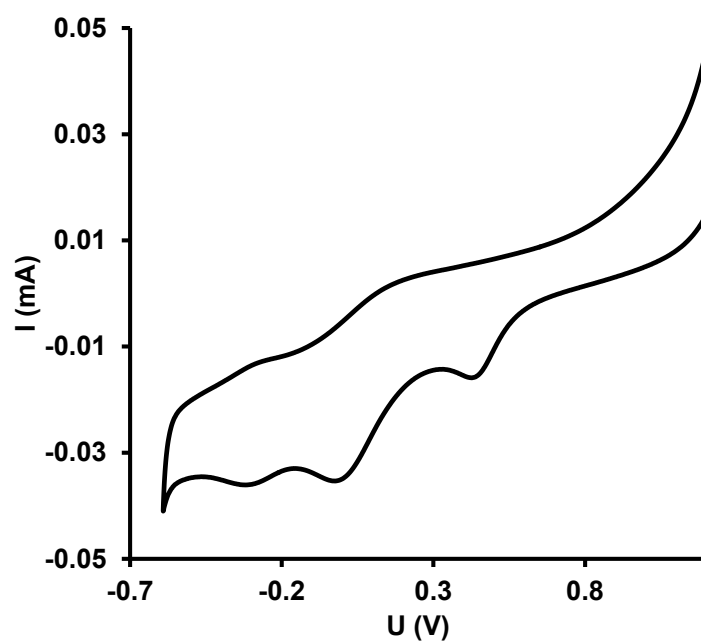

**Figure S10.** Cyclic voltammogram of the copper(II)-trenpyz 3/2 system in 50 % EtOH-H<sub>2</sub>O at pH = 7.2 ([L] = 1.24 mM, [Cu<sup>2+</sup>] = 1.86 mM)



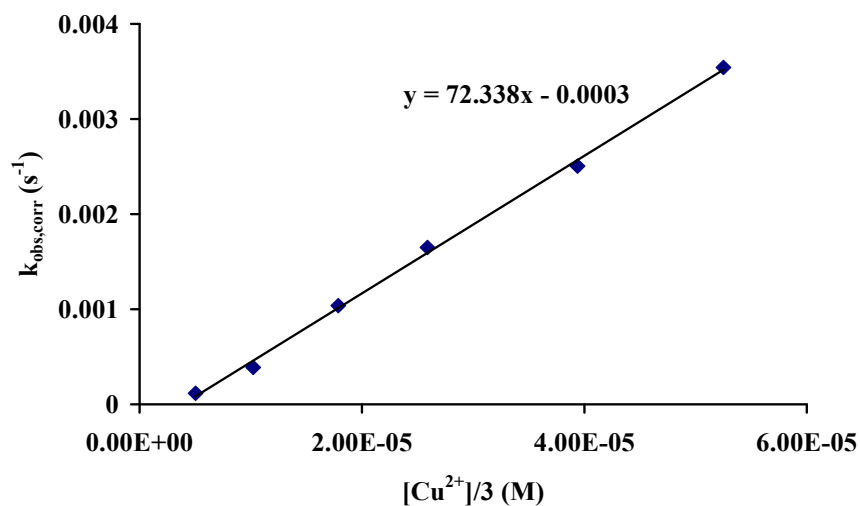

**Figure S11.** Rate constants of H<sub>2</sub>dtbc oxidation promoted by the copper(II)-trenpyz 3/2 system in 50% EtOH-H<sub>2</sub>O as a function of the concentration of trinuclear complexes (T = 298 K, [H<sub>2</sub>dtbc]<sub>0</sub> = 2 mM)

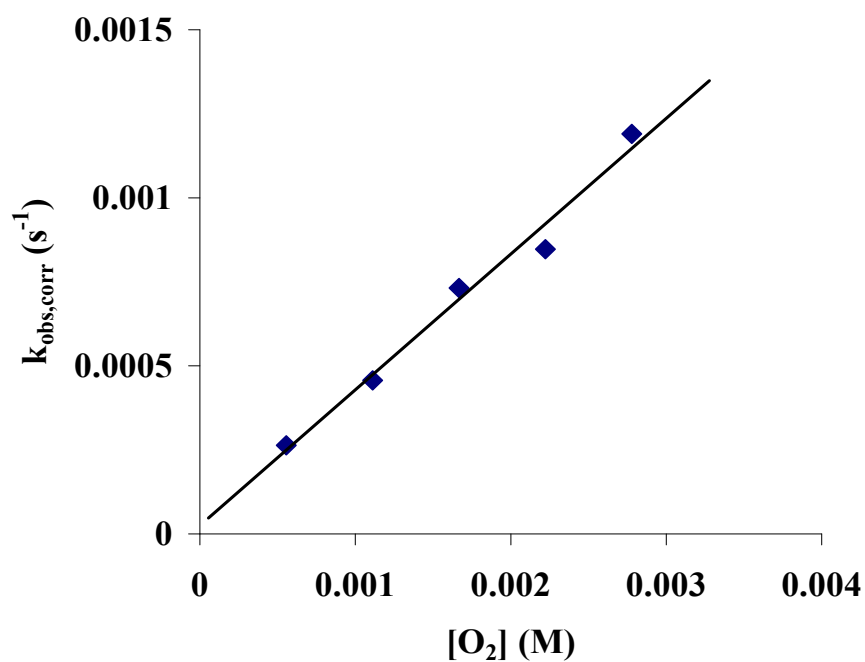

**Figure S12.** Rate constants of H<sub>2</sub>dtbc oxidation promoted by the copper(II)-trenpyz 3/2 system in 50% EtOH-H<sub>2</sub>O as a function of the concentration of dissolved dioxygen (T = 298 K, [Cu<sup>2+</sup>]<sub>tot</sub> = 75 μM, [L] = 50 μM, [H<sub>2</sub>dtbc]<sub>0</sub> = 2 mM)

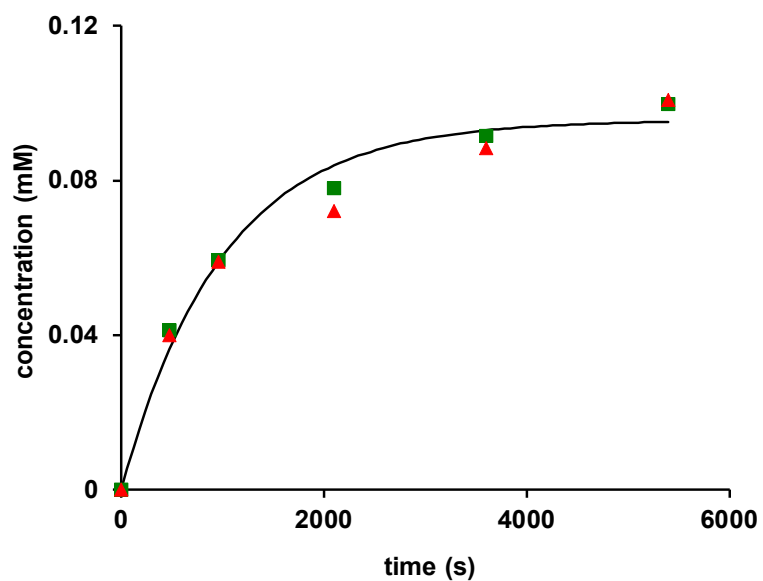

**Figure S13.** H<sub>2</sub>O<sub>2</sub> (green square) and dtbq (red triangle) formation during H<sub>2</sub>dtbc oxidation promoted by the copper(II)-trenpyz 3/2 system in aqueous solution at pH = 8.1 ( $T = 298$  K,  $I = 0.1$  M,  $[\mathbf{L}]_{\text{tot}} = 6.84 \times 10^{-5}$  M,  $[\text{Cu}^{2+}]_{\text{tot}} = 1.02 \times 10^{-4}$  M,  $c_{\text{H}_2\text{dtbc},0} = 0.1$  mM).

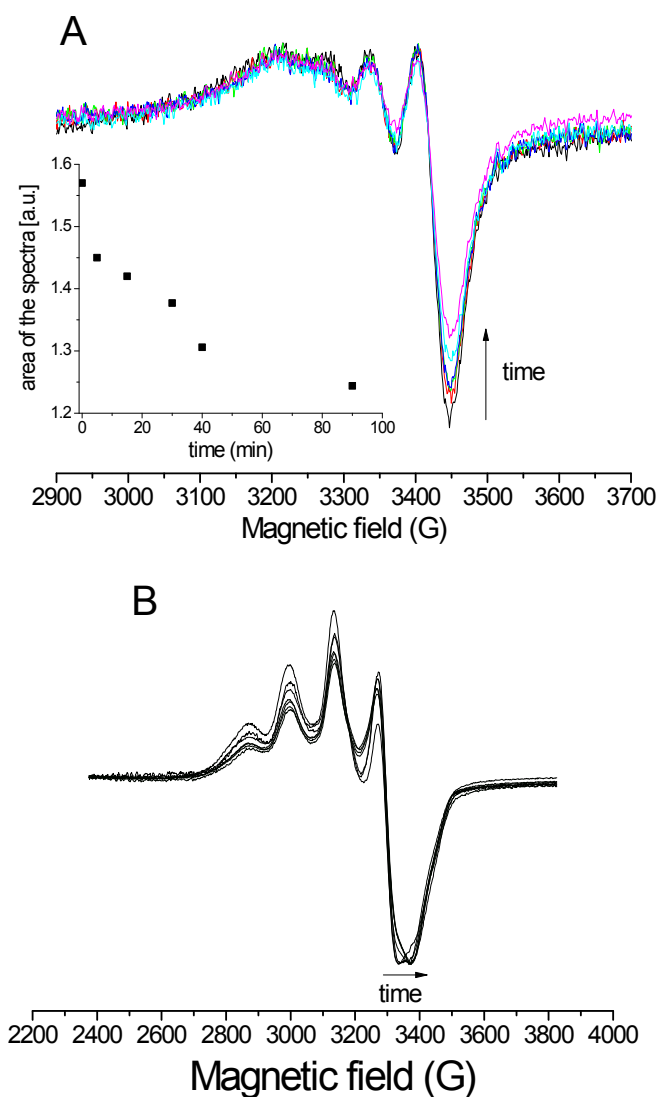

**Figure S14.** Time dependence of EPR spectra detected at room temperature (A) and at 77 K (B) of the Cu(II)-trenpyz 3/2 system during the oxidation of H<sub>2</sub>dtbc under aerobic conditions (pH = 7.2, [Cu(II)] = 1.5 mM, C<sub>H<sub>2</sub>dtbc</sub> = 5 mM). The insert in figure A shows the timed dependence of calculated EPR intensity. Note, that the spectra were recorded in a capillary, therefore the dissolution of oxygen into the solution was rather limited.
